# Supplementary material for: Longitudinal muti-modal data prediction model for mild cognitive impairment by deep survival analysis
Source: Research Square preprint supplement (doi:10.21203/rs.3.rs-8233936/v1), 2025-12-08
Supplement: Supplementary file 1 [file 03d6429f57c3b4b975bf2292.docx]

**METHODS**

***Diagnostic criteria***

***NC* (*normal cognition*)**

1. Subject must be free of memory complaints, verified by a study partner, beyond what one would expect for age.

2. Normal memory function documented by scoring above education adjusted cutoffs on the Logical Memory II subscale (Delayed Paragraph Recall, Paragraph A only) from the Wechsler Memory Scale –Revised (the maximum score is 25):

a. ≥9 for 16 or more years of education

b. ≥5 for 8-15 years of education

c. ≥3 for 0-7 years of education.

3. Mini-Mental State Exam (MMSE) score between 24 and 30 (inclusive). (Exceptions may be made for subjects with less than 8 years of education at the discretion of the project director).

4. Clinical Dementia Rating (CDR) = 0. Memory Box score must be 0.

5. Cognitively normal, based on an absence of significant impairment in cognitive functions or activities of daily living.

***MCI* (*mild cognitive impairment*)**

1. Subject must have a subjective memory concern as reported by subject, study partner, or clinician.

2. Abnormal memory function documented by scoring within the education adjusted ranges on the Logical Memory II subscale (Delayed Paragraph Recall, Paragraph A only) from the Wechsler Memory Scale –Revised (the maximum score is 25):

a. ≤11 for 16 or more years of education

b. ≤9 for 8-15 years of education

c. ≤6 for 0-7 years of education.

3. MMSE score between 24 and 30 (inclusive). (Exceptions may be made for subjects with less than 8 years of education at the discretion of the project director).

4. CDR = 0.5. Memory Box score must be at least 0.5.

5. General cognition and functional performance sufficiently preserved such that a diagnosis of Alzheimer’s disease (AD) cannot be made by the site physician at the time of the screening visit.

***AD*(*Alzheimer’s disease*)**

1. Subject must have a subjective memory concern as reported by subject, study partner, or clinician.

2. Abnormal memory function documented by scoring within the education adjusted ranges on the Logical Memory II subscale (Delayed Paragraph Recall, Paragraph A only) from the Wechsler Memory Scale –Revised (the maximum score is 25):

a. ≤8 for 16 or more years of education

b. ≤4 for 8-15 years of education

c. ≤2 for 0-7 years of education.

3. MMSE score between 20 and 26 (inclusive) (Exceptions may be made for subjects with less than 8 years of education at the discretion of the project director).

4. CDR = 0.5 or 1.0.

5. The National Institute of Neurological and Communicative Disorders and Stroke-Alzheimer Disease and Related Disorders Association (NINCDS/ADRDA) criteria for probable AD.

***Cognitive assessments***

***ADAS11***

The Alzheimer's Disease Assessment Scale-Cognitive Subscale (ADAS-Cog) is specifically designed to evaluate the severity of cognitive impairment across the mild to severe spectrum of Alzheimer's Disease (AD). ADAS-Cog assesses various cognitive domains, including memory, language, and praxis. The specific tasks encompass word recall, naming objects and fingers, commands, constructional praxis, ideational praxis, orientation, word recognition, language, comprehension of spoken language, word finding difficulty, and remembering test instructions. Typically, studies incorporate all 11 tasks and score them on a single scale ranging from 0 to 70, referred to as “ADAS-Cog-11”. Higher scores indicate worse performance.

***ADAS13***

ADAS-Cog 13 includes all ADAS-Cog-11 items as well as a test of delayed word recall and a number cancellation or maze task, ranging from 0 to 85. Higher scores indicate worse performance.

***ADASQ4***

ADASQ4, often referred to as ADAS Delayed Word Recall, is a component of the ADAS-cog that assesses memory function, specifically delayed recall. ADASQ4 ranges from 0 to 12. Higher scores indicate worse performance.

***FAQ***

Functional Activities Questionnaire (FAQ) is a brief assessment tool used to evaluate an individual's ability to perform daily living activities, ranging from 0 to 30. Higher scores indicate worse performance.

***RAVLT Immediate Recall***

RAVLT Immediate Recall assesses an individual's ability to recall a list of words immediately after hearing them. RAVLT Immediate Recall provides an indication of short-term memory and immediate recall capabilities. Higher scores indicate better performance. RAVLT Immediate Recall refers to the sum of scores from 5 first trials (Trials 1 to 5).

***RAVLT Learning Across Trials***

RAVLT Learning Across Trials evaluates how well an individual learns and retains information over multiple presentations of the same word list. The word list is presented multiple times (typically five times), and after each presentation, the individual is asked to recall the words. A gradual increase in the number of correctly recalled words across trials suggests effective learning. RAVLT Learning Across Trials refers to the score of Trial 5 minus the score of Trial 1

***RAVLT Forgetting***

RAVLT Forgetting measures the extent to which an individual forgets information over a short period after learning it. After completing the learning trials, the individual is typically given a distraction task for a set period (e.g., 20-30 minutes). Following the distraction, the individual is asked to recall the words again. The number of words forgotten provides an index of forgetting. A higher number of forgotten words indicates greater forgetting. RAVLT Forgetting refers to the score of Trial 5 minus score of the delayed recall.

***RAVLT Percentage of Forgetting***

RAVLT Percentage of Forgetting is derived by dividing the number of words forgotten by the total number of words correctly recalled during the best learning trial, and then multiplying by 100. A higher percentage indicates a greater proportion of forgetting relative to what was learned. RAVLT Percentage of Forgetting refers to RAVLT Forgetting divided by the score of Trial 5.

***TMT-B***

The Trail Making Test-B (TMT-B) is a neuropsychological assessment tool used to evaluate executive function, providing information about an individual's ability to switch between tasks and process complex visual information efficiently. TMT-B ranges from 0 to 25. Higher scores indicate worse performance.

***mPACCdigit***

mPACCdigit stands for ADNI modified Preclinical Alzheimer's Cognitive Composite (PACC) with Digit Symbol Substitution. It is a cognitive assessment tool derived from the original PACC, with the inclusion of the Digit Symbol Substitution test. The mPACCdigit evaluates multiple aspects of cognitive function, including memory, attention, and processing speed. The Digit Symbol Substitution test specifically assesses processing speed and working memory by requiring the individual to match symbols to numbers as quickly as possible.

***mPACCtrailsB***

mPACCtrailsB represents ADNI modified Preclinical Alzheimer's Cognitive Composite (PACC) with Trails B. Trails B is a part of the Trails Making Test, which is a neuropsychological test used to assess cognitive flexibility and set-shifting abilities. In Trails B, the individual is required to connect a series of numbered and lettered circles, alternating between numbers and letters in ascending order. The mPACCtrailsB focuses on evaluating the ability to switch between different tasks and maintain focus.

***sMRI acquisition***

The images used in this study were T1-weighted sMR images, which were acquired using 1.5T (ADNI1) or 3.0T (ADNIGO/2/3) MR scanners via 3D magnetization -prepared rapid the gradient-echo sequence with a resolution of (1 × 1 × 1) millimeter voxel size.

***Image preprocessing***

The sMRI images were preprocessed using the Statistical Parametric Mapping (SPM) software package implemented in MATLAB 2020a. The specific procedural steps are as follows:

1. Format Conversion: The dcm2niigui tool in the MRICro software was used to convert the original T1-weighted MRI images from DICOM format (*.dcm) to NIfTI format (*.nii), ensuring compatibility with the SPM12 software package.
2. Image Quality Assessment: Visual and algorithmic quality assessments were performed using SPM12, including motion correction, to identify and mitigate artifacts or distortions in the acquired images.
3. Spatial Normalization: Structural images were spatially normalized to the Montreal Neurological Institute (MNI) standard space using the DARTEL (Diffeomorphic Anatomical Registration Through Exponentiated Lie algebra) algorithm within the VBM8 toolbox. This process involved affine transformation and nonlinear warping of gray matter probability maps to achieve high-dimensional registration, ensuring anatomical correspondence across subjects at equivalent voxel coordinates.
4. Brain Tissue Segmentation: Non-brain tissues, such as skull and scalp, along with noise signals, were removed through automated brain extraction. Images were subsequently segmented into gray matter, white matter, and cerebrospinal fluid components using prior tissue probability maps. Voxel-wise tissue classification was conducted based on Bayesian inference, and gray matter density maps were generated for further volumetric analysis using the Voxel-Based Morphometry (VBM) approach.
5. Gaussian Smoothing: A Gaussian kernel with a full width at half maximum (FWHM) of 8 mm was applied to the normalized gray matter maps to account for residual inter-subject anatomical variability, reduce noise, and improve the signal-to-noise ratio, thereby enhancing the sensitivity of subsequent statistical analyses.

***Feature extraction***

The Automated Anatomical Labeling (AAL) atlas was resampled into the whole-brain gray matter density map space using the REST toolbox in MATLAB 2020a. For each brain region, the average gray matter density was computed as the mean intensity value across all voxels within that region. The AAL atlas divides the entire brain into 116 anatomically defined regions based on Montreal Neurological Institute (MNI) coordinates, including 90 cerebrum subregions (78 cortical and 12 subcortical) and 26 cerebellar subregions.

Due to the extended duration of data collection in the Alzheimer’s Disease Neuroimaging Initiative (ADNI) database, variability in MRI scanner manufacturers, hardware configurations, and imaging protocols across multiple acquisition sites has introduced potential heterogeneity in image acquisition parameters over time. Specifically, ADNI-1 (2004–2009) primarily acquired 1.5T T1-weighted structural MRI scans, with a subset collected at 3.0T; ADNI GO/2 (2010–2016) focused on 3.0T T1-weighted images using protocols comparable to those of ADNI-1; and ADNI-3 (2016–present) continues to collect 3.0T T1-weighted images with updated sequence parameters. To improve data comparability and minimize scanner-related variability, regional gray matter values were normalized by computing the ratio of each region's gray matter volume to the total intracranial gray matter volume. These normalized measures were used as neuroimaging features for subsequent model development.

**RESULTS**

**Table 1 Spatial structure order and related information of different brain regions.**

| Spatial structure order | NO.AAL | Brain region | Anatomical structure | Location | Spatial structure order | NO.AAL | Brain region | Anatomical structure | Location |
| --- | --- | --- | --- | --- | --- | --- | --- | --- | --- |
| 1 | 29 | Insula | Insula | Left hemisphere | 59 | 113 | Vermis | Vermis | Vermis |
| 2 | 31 | Anterior cingulate and paracingulate gyri | Limbic lobe | Left hemisphere | 60 | 114 | Vermis | Vermis | Vermis |
| 3 | 33 | Median cingulate and paracingulate gyri | Limbic lobe | Left hemisphere | 61 | 115 | Vermis | Vermis | Vermis |
| 4 | 35 | Posterior cingulate gyrus | Limbic lobe | Left hemisphere | 62 | 116 | Vermis | Vermis | Vermis |
| 5 | 37 | Hippocampus | Limbic lobe | Left hemisphere | 63 | 108 | Cerebelum | Cerebellum | Right cerebellum |
| 6 | 39 | Parahippocampal gyrus | Limbic lobe | Left hemisphere | 64 | 106 | Cerebelum | Cerebellum | Right cerebellum |
| 7 | 83 | Temporal pole: superior temporal gyrus | Limbic lobe | Left hemisphere | 65 | 104 | Cerebelum | Cerebellum | Right cerebellum |
| 8 | 87 | Temporal pole: middle temporal gyrus | Limbic lobe | Left hemisphere | 66 | 102 | Cerebelum | Cerebellum | Right cerebellum |
| 9 | 41 | Amygdala | Subcortical gray nuclei | Left hemisphere | 67 | 100 | Cerebelum | Cerebellum | Right cerebellum |
| 10 | 71 | Caudate nucleus | Subcortical gray nuclei | Left hemisphere | 68 | 98 | Cerebelum | Cerebellum | Right cerebellum |
| 11 | 73 | Lenticular nucleus, putamen | Subcortical gray nuclei | Left hemisphere | 69 | 96 | Cerebelum | Cerebellum | Right cerebellum |
| 12 | 75 | Lenticular nucleus, pallidum | Subcortical gray nuclei | Left hemisphere | 70 | 94 | Cerebelum_Crus | Cerebellum | Right cerebellum |
| 13 | 77 | Thalamus | Subcortical gray nuclei | Left hemisphere | 71 | 92 | Cerebelum_Crus | Cerebellum | Right cerebellum |
| 14 | 3 | Superior frontal gyrus dorsolateral | Frontal lobe | Left hemisphere | 72 | 90 | Inferior temporal gyrus | Temporal lobe | Right hemisphere |
| 15 | 7 | Middle frontal gyrus | Frontal lobe | Left hemisphere | 73 | 86 | Middle temporal gyrus | Temporal lobe | Right hemisphere |
| 16 | 11 | Inferior frontal gyrus, opercular part | Frontal lobe | Left hemisphere | 74 | 82 | Superior temporal gyrus | Temporal lobe | Right hemisphere |
| 17 | 13 | Inferior frontal gyrus, triangular part | Frontal lobe | Left hemisphere | 75 | 80 | Heschl gyrus | Temporal lobe | Right hemisphere |
| 18 | 19 | Supplementary motor area | Frontal lobe | Left hemisphere | 76 | 56 | Fusiform gyrus | Occipital lobe | Right hemisphere |
| 19 | 23 | Superior frontal gyrus, medial | Frontal lobe | Left hemisphere | 77 | 48 | Lingual gyrus | Occipital lobe | Right hemisphere |
| 20 | 69 | Paracentral lobule | Frontal lobe | Left hemisphere | 78 | 46 | Cuneus | Occipital lobe | Right hemisphere |
| 21 | 5 | Superior frontal gyrus orbital part | Frontal lobe | Left hemisphere | 79 | 44 | Calcarine fissure and surrounding cortex | Occipital lobe | Right hemisphere |
| 22 | 9 | Middle frontal gyrus, orbital part | Frontal lobe | Left hemisphere | 80 | 54 | Inferior occipital gyrus | Occipital lobe | Right hemisphere |
| 23 | 15 | Inferior frontal gyrus, orbital part | Frontal lobe | Left hemisphere | 81 | 52 | Middle occipital gyrus | Occipital lobe | Right hemisphere |
| 24 | 21 | Olfactory cortex | Frontal lobe | Left hemisphere | 82 | 50 | Superior occipital gyrus | Occipital lobe | Right hemisphere |
| 25 | 25 | Superior frontal gyrus, medial orbital | Frontal lobe | Left hemisphere | 83 | 68 | Precuneus | Parietal lobe | Right hemisphere |
| 26 | 27 | Gyrus rectus | Frontal lobe | Left hemisphere | 84 | 66 | Angular gyrus | Parietal lobe | Right hemisphere |
| 27 | 1 | Percental gyrus | Central region | Left hemisphere | 85 | 64 | Supramarginal gyrus | Parietal lobe | Right hemisphere |
| 28 | 17 | Rolandic operculum | Central region | Left hemisphere | 86 | 62 | Inferior parietal, but supramarginal and angular gyri | Parietal lobe | Right hemisphere |
| 29 | 57 | Postcentral gyrus | Central region | Left hemisphere | 87 | 60 | Superior parietal gyrus | Parietal lobe | Right hemisphere |
| 30 | 59 | Superior parietal gyrus | Parietal lobe | Left hemisphere | 88 | 58 | Postcentral gyrus | Central region | Right hemisphere |
| 31 | 61 | Inferior parietal, but supramarginal and angular gyri | Parietal lobe | Left hemisphere | 89 | 18 | Rolandic operculum | Central region | Right hemisphere |
| 32 | 63 | Supramarginal gyrus | Parietal lobe | Left hemisphere | 90 | 2 | Percental gyrus | Central region | Right hemisphere |
| 33 | 65 | Angular gyrus | Parietal lobe | Left hemisphere | 91 | 28 | Gyrus rectus | Frontal lobe | Right hemisphere |
| 34 | 67 | Precuneus | Parietal lobe | Left hemisphere | 92 | 26 | Superior frontal gyrus, medial orbital | Frontal lobe | Right hemisphere |
| 35 | 49 | Superior occipital gyrus | Occipital lobe | Left hemisphere | 93 | 22 | Olfactory cortex | Frontal lobe | Right hemisphere |
| 36 | 51 | Middle occipital gyrus | Occipital lobe | Left hemisphere | 94 | 16 | Inferior frontal gyrus,orbital part | Frontal lobe | Right hemisphere |
| 37 | 53 | Inferior occipital gyrus | Occipital lobe | Left hemisphere | 95 | 10 | Middle frontal gyrus, orbital part | Frontal lobe | Right hemisphere |
| 38 | 43 | Calcarine fissure and surrounding cortex | Occipital lobe | Left hemisphere | 96 | 6 | Superior frontal gyrus orbital part | Frontal lobe | Right hemisphere |
| 39 | 45 | Cuneus | Occipital lobe | Left hemisphere | 97 | 70 | Paracentral lobule | Frontal lobe | Right hemisphere |
| 40 | 47 | Lingual gyrus | Occipital lobe | Left hemisphere | 98 | 24 | Superior frontal gyrus, medial | Frontal lobe | Right hemisphere |
| 41 | 55 | Fusiform gyrus | Occipital lobe | Left hemisphere | 99 | 20 | Supplementary motor area | Frontal lobe | Right hemisphere |
| 42 | 79 | Heschl gyrus | Temporal lobe | Left hemisphere | 100 | 14 | Inferior frontal gyrus, triangular part | Frontal lobe | Right hemisphere |
| 43 | 81 | Superior temporal gyrus | Temporal lobe | Left hemisphere | 101 | 12 | Inferior frontal gyrus, opercular part | Frontal lobe | Right hemisphere |
| 44 | 85 | Middle temporal gyrus | Temporal lobe | Left hemisphere | 102 | 8 | Middle frontal gyrus | Frontal lobe | Right hemisphere |
| 45 | 89 | Inferior temporal gyrus | Temporal lobe | Left hemisphere | 103 | 4 | Superior frontal gyrus dorsolateral | Frontal lobe | Right hemisphere |
| 46 | 91 | Cerebelum_Crus | Cerebellum | Left cerebellum | 104 | 78 | Thalamus | Subcortical gray nuclei | Right hemisphere |
| 47 | 93 | Cerebelum_Crus | Cerebellum | Left cerebellum | 105 | 76 | Lenticular nucleus, pallidum | Subcortical gray nuclei | Right hemisphere |
| 48 | 95 | Cerebelum | Cerebellum | Left cerebellum | 106 | 74 | Lenticular nucleus, putamen | Subcortical gray nuclei | Right hemisphere |
| 49 | 97 | Cerebelum | Cerebellum | Left cerebellum | 107 | 72 | Caudate nucleus | Subcortical gray nuclei | Right hemisphere |
| 50 | 99 | Cerebelum | Cerebellum | Left cerebellum | 108 | 42 | Amygdala | Subcortical gray nuclei | Right hemisphere |
| 51 | 101 | Cerebelum | Cerebellum | Left cerebellum | 109 | 88 | Temporal pole: middle temporal gyrus | Limbic lobe | Right hemisphere |
| 52 | 103 | Cerebelum | Cerebellum | Left cerebellum | 110 | 84 | Temporal pole: superior temporal gyrus | Limbic lobe | Right hemisphere |
| 53 | 105 | Cerebelum | Cerebellum | Left cerebellum | 111 | 40 | Parahippocampal gyrus | Limbic lobe | Right hemisphere |
| 54 | 107 | Cerebelum | Cerebellum | Left cerebellum | 112 | 38 | Hippocampus | Limbic lobe | Right hemisphere |
| 55 | 109 | Vermis | Vermis | Vermis | 113 | 36 | Posterior cingulate gyrus | Limbic lobe | Right hemisphere |
| 56 | 110 | Vermis | Vermis | Vermis | 114 | 34 | Median cingulate and paracingulate gyri | Limbic lobe | Right hemisphere |
| 57 | 111 | Vermis | Vermis | Vermis | 115 | 32 | Anterior cingulate and paracingulate gyri | Limbic lobe | Right hemisphere |
| 58 | 112 | Vermis | Vermis | Vermis | 116 | 30 | Insula | Insula | Right hemisphere |
